# Supplementary material
Source: PubMed Central journal article supplement (PMC5210751)
Supplement: supp_pp.16.01539_PP2016-01539DR1_Supplemental_Material.pdf [file supp_pp.16.01539_PP2016-01539DR1_Supplemental_Material.pdf]

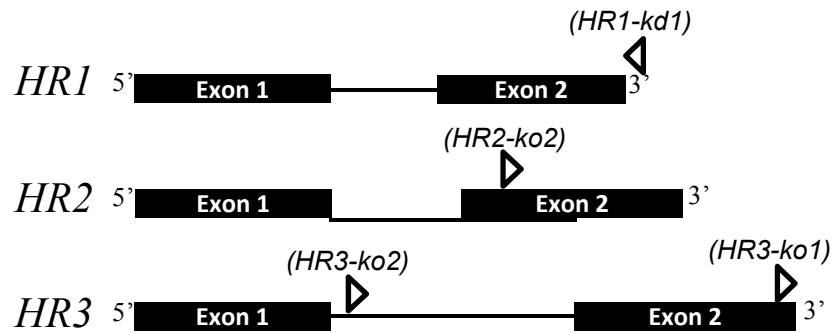

**Supplemental Fig. S1.** Schematic gene structures and location and direction of the T-DNA insertions (arrowheads) in *HR1*, *HR2* and *HR3*. *HR1-kd1*: SALK\_056764 (+<sup>778</sup>ACTCAA..◀..CAAATG<sup>+789</sup>); *HR2-ko1*: SALK\_093095 (+<sup>582</sup>TATGGC..▶..CAAGAT<sup>+593</sup>); *HR3-ko1*: SALK\_122954 (+<sup>972</sup>AAGAAA..▶..ACGGAA<sup>+983</sup>); *HR3-ko2*: WiscDsLox420C08 (+<sup>361</sup>AATTTA..▶..AATAGTT<sup>+372</sup>).

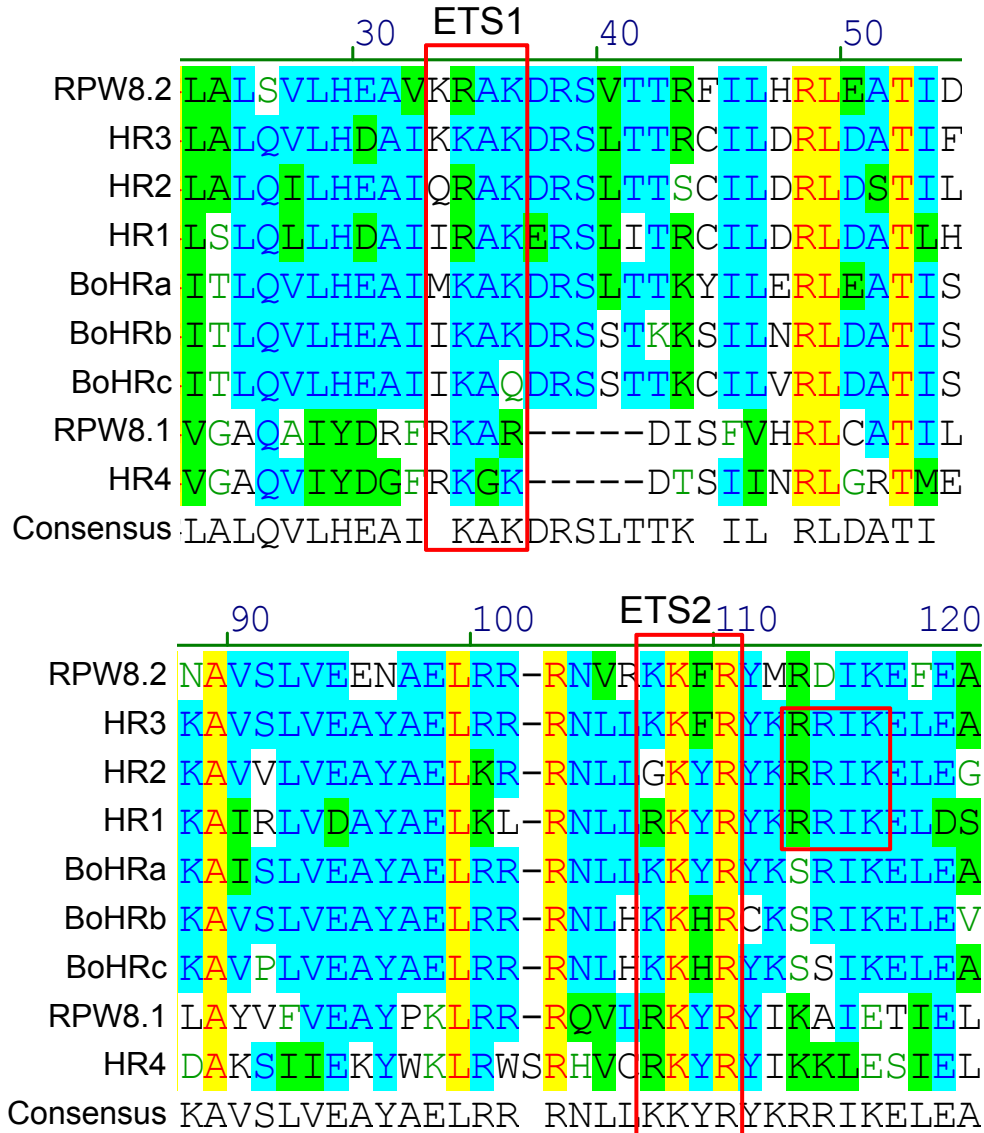

**Supplemental Fig. S2.** Protein sequence alignment of the RPW8 family. Six family members (RPW8.1, RPW8.2, HR1, HR2, HR3, and HR4) from *Arabidopsis thaliana* and three family members (BoHRa, BoHRb and BoHRc) from *Brassica oleracea* were aligned. The two core EHM-targeting signals (ETSs) R/K-R/K-X-R/K identified in Wang et al., 2013 were highlighted in red boxes. Note that the ETS2 is more conserved than the ETS1 and there is a third R/K-R/K-X-R/K motif downstream of ETS2 in HR1, HR2 and HR3.

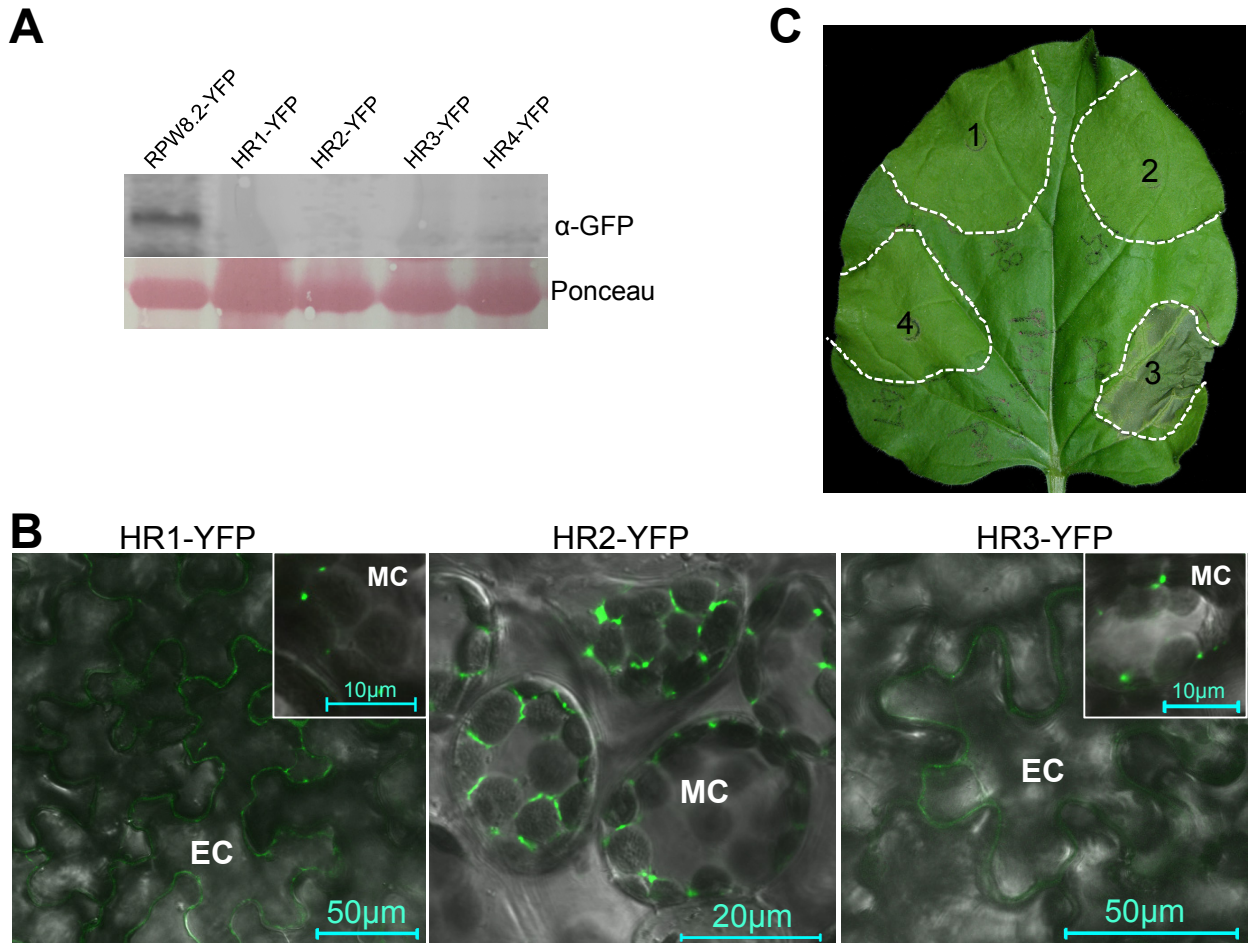

**Supplemental Fig. S3.** Expression of HR1-YFP, HR2-YFP and HR3-YFP is detectable in *N. benthamiana* when transiently co-expressed with a viral RNAi suppressor. **A.** A Western blotting showing that HR1-YFP, HR2-YFP, HR3-YFP and HR4-YFP was not detectable in T4 Arabidopsis lines transgenic for each of the DNA constructs under control of their respective native promoter (NP). An Arabidopsis line expressing RPW8.2-YFP was used as control. An anti-GFP antibody (Abcam, A290) capable of recognizing YFP was used to detect the YFP fusion proteins. Equal loading of the microsomal fraction was shown by Ponceau staining of the gel. **B.** Confocal images showing expression and subcellular localization of the indicated fusion proteins in epidermal cells (EP) and/or mesophyll cells (MC) of *N. benthamiana*. Agrobacterial cells harboring either *NP::HR1-YFP*, *NP::HR2-YFP*, *NP::HR3-YFP* or *NP::HR4-YFP* were mixed in equal amount with Agrobacterial cells containing a DNA construct for expressing the *Turnip crinkle virus* (TCV) coat protein. The Agrobacterial suspension mixture ( $OD_{600}=0.5$ ) was infiltrated to leaves of *N. benthamiana*. Infiltrated leaf sections were subjected to confocal imaging at 48 hrs after infiltration. Note HR4-YFP was not detectable and is not shown. **C.** A picture a *N. benthamiana* leaf infiltrated with Agrobacterial cell mixtures harboring the TCV coat protein construct and either *NP::HR1-YFP* (1), *NP::HR2-YFP* (2), *NP::HR3-YFP* (3) or *NP::HR4-YFP* (4). The picture was taken at 72 hrs after infiltration.

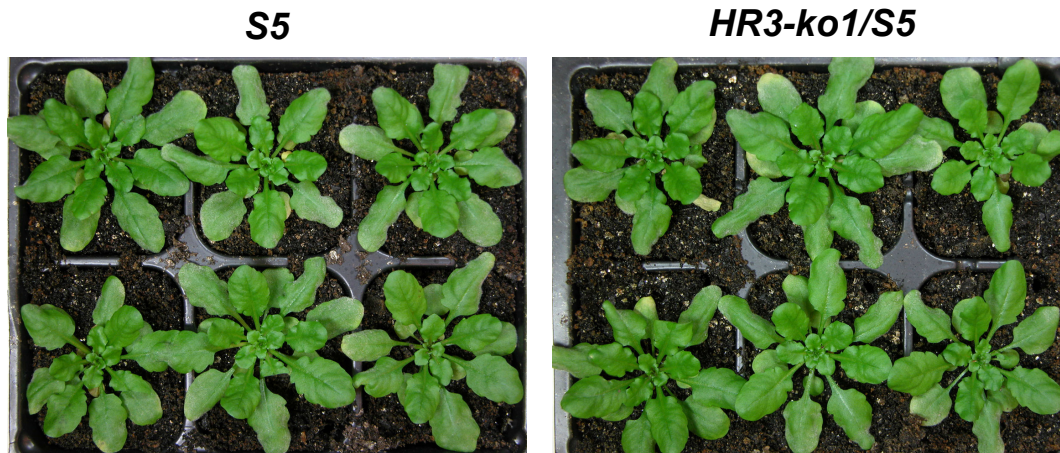

**Supplemental Fig. S4.** HR3 is not required for RPW8.1 and RPW8.2-mediated resistance. To test if loss of HR3 affects RPW8.1 and RPW8.2-mediated resistance, the *HR3-ko1* alleles was cross into S5, a *Col-gI* line transgenic for a single copy of a genomic fragment containing *RPW8.1* and *RPW8.2* with their native promoters. Plants of the indicated genotypes were inoculated with *Gc UCSC1* and pictures were taken at 10 dpi.

**Supplemental Table 1. Information about the DNA constructs used in this study**

| Name of construct              | Gene name (ID)  | Purpose             | Primers (5' to 3') for amplification                                          | Vector     | Cloning Method      |
|--------------------------------|-----------------|---------------------|-------------------------------------------------------------------------------|------------|---------------------|
| HR1-YFP                        | HR1 (At3g50450) | localization        | cgggatccGAGCGGTTTGAGCATCTTGTT<br>cgggatccGAAGATGAACCGGATCTCGTGCT              | pPZPYFP23' | BamHI digestion     |
| HR2-YFP                        | HR2 (At3g50460) | localization        | cgggatccGCATCTCAATGGACTTTAACAACACCA<br>cgggatccAAAACGAAGCGAATCCCGTGAT         | pPZPYFP23' | BamHI digestion     |
| HR3-YFP                        | HR3 (At3g50470) | localization        | cgggatccGCTAAAGAGCTAATCTCTTGACCCA<br>cgggatccCTTCAAGACAAATCGGATCTCACGGT       | pPZPYFP23' | BamHI digestion     |
| HR4-YFP                        | HR4 (At3g50480) | localization        | cgggatccCATTCGTTGGAGTTGTGTAATGAGGA<br>cgggatccGCCTTCATTTCTTTGATATCGGTCCA      | pPZPYFP23' | BamHI digestion     |
| R82p-HR3-YFP                   | HR3 (At3g50470) | localization        | cgggatccGCTAAAGAGCTAATCTCTTGACCCA<br>gcagatctCACTGTACAGCTCGTCCATG             | pCX-DG-82p | T/A cloning         |
| 35S-YFP-HR1                    | HR1 (At3g50450) | localization        | caccATGCCTCTTGTGAGCTTCTTACAA<br>cgggatccTCATTTGAAGATGAACCGGATCTCGT            | pEG104     | Gateway cloning     |
| 35S-YFP-HR2                    | HR2 (At3g50460) | localization        | caccATGCCCTTACCGAGATTATCGCA<br>cgggatccCTAATTCAAAACGAAGCGAATCCCGT             | pEG104     | Gateway cloning     |
| 35S-YFP-HR3                    | HR3 (At3g50470) | localization        | caccATGCCGGTTAGTGAGATTATG<br>cgggatccTCACTTCAAGACAAATCGGATCTCA                | pEG104     | Gateway cloning     |
| 35S-YFP-HR4                    | HR4 (At3g50480) | localization        | caccATGCCGATGCTGAGCTTGCT<br>cgggatccTCATTTATATGCTTTTCAGATATCTGGG              | pEG104     | Gateway cloning     |
| NP-HR3 <sup>D116G</sup>        | HR3 (At3g50470) | defense function    | TCATTAAGATGGATGGTAGGTGGGATGTCCAAGTCAAT<br>ATTGACTTGGACATCCACACCTACCATCTTAATGA | pPZPYFP23' | BamHI digestion     |
| NP-HR3 <sup>AC165</sup>        | HR3 (At3g50470) | defense function    | cgggatccAAAACGAAGCGAATCCCGTGAT<br>cgggatccTCATGTTGACGAGTGATTTCATCAAGT         | pPZPYFP23' | BamHI digestion     |
| NP-HR3- <sup>AC126/G186D</sup> | HR3 (At3g50470) | defense function    | cgggatccAAAACGAAGCGAATCCCGTGAT<br>cgggatccAGAGTCATCACTCGAACATCAACA            | pPZPYFP23' | BamHI digestion     |
| R82p-HR3- <sup>AC165</sup>     | HR3             | expression          | caggatccATGCCGGTTAGTGAGATTATGGCA<br>cgggatccTCATGTTGACGAGTGATTTCATCAAGT       | pCX-DG-82p | T/A cloning         |
| HR321-1miR                     |                 | silencing HR1/2/3   | gaTGTTTAGTGTTCATATCGGACtctctctttgtattcc                                       | pBTEX      | <i>Kpn I/Bam HI</i> |
| HR321-2miR                     |                 | silencing HR1/2/3   | gaGTCCGATATGAACACTAAACAtcaaaagagaatcaatga                                     | pBTEX      | <i>Kpn I/Bam HI</i> |
| HR321-3miR                     |                 | silencing HR1/2/3   | gaGTACGATATGAACCTAAACtccacaggtcgtgatag                                        | pBTEX      | <i>Kpn I/Bam HI</i> |
| HR321-4miR                     |                 | silencing HR1/2/3   | gaAGTTTAGAGTTCATATCGTACTctacatatattctct                                       | pBTEX      | <i>Kpn I/Bam HI</i> |
| R82p-HR3g                      | HR3             | expression          | caggatccATGCCGGTTAGTGAGATTATGGCA<br>cgggatccTCACTTCAAGACAAATCGGATCTCACGGT     | pCX-DG-82p | T/A cloning         |
| HR3n                           | HR3(At3g50470)  | HR3 Nt domain       | cgggatccGCTAAAGAGCTAATCTCTTGACCCA<br>caccatggTTGACGAGTGATTTCATCAAGTTTAGTGT    | pPZPYFP23' | BamHI digestion     |
| HR3c                           | HR3(At3g50470)  | HR3 Ct domain       | caccatggCCAAGTATGTTATTTGTTTCAAGAGCA<br>cgggatccTCACTTCAAGACAAATCGGATCTCA      | pPZPYFP23' | BamHI digestion     |
| R82n                           | HR3(At3g50470)  | RPW8.2 Nt domain    | ttggatccTCACCGAAATGTTAGTATTACAG<br>caccatggCATTATTTTGTCAAGTTTAGTGTGATT        | pPZPYFP23' | BamHI digestion     |
| R82c                           | HR3(At3g50470)  | RPW8.2 Ct domain    | caccatggCCTCAACCGAAGTTTGAATCCA<br>ttggatccTCAAGAATCATCACTGCAGAAC              | pPZPYFP23' | BamHI digestion     |
| HR3n-R82c-YFP                  | HR1(At3g )      | localization & func | cgggatccGCTAAAGAGCTAATCTCTTGACCCA<br>gcagatctCACTGTACAGCTCGTCCATG             | pPZPYFP23' | BamHI digestion     |
| R82n-HR3c-YFP                  | HR1(At3g )      | localization & func | ttggatccTCACCGAAATGTTAGTATTACAG<br>gcagatctCACTGTACAGCTCGTCCATG               | pPZPYFP23' | BamHI digestion     |
| HR3n-R82c-YFP                  | HR1(At3g )      | localization & func | cgggatccGCTAAAGAGCTAATCTCTTGACCCA<br>gcagatctCACTGTACAGCTCGTCCATG             | pCX-DG-82p | T/A cloning         |
| R82n-HR3c-YFP                  | HR1(At3g )      | localization & func | ttggatccTCACCGAAATGTTAGTATTACAG<br>gcagatctCACTGTACAGCTCGTCCATG               | pCX-DG-82p | T/A cloning         |
